# Supplementary material
Source: Elsevier journal article supplement (https://www.sciencedirect.com/science/article/pii/S002175571830367X)
Supplement: mmc1 [file S002175571830367X:mmc1.docx]

**Supplementary Material**

**Appendix A**

Caregiver Reported Early Development Instruments (CREDI)

SHORT Form: AGE RANGE 0–5 MONTHS

Date: _____________________________

Participant’s Identification: ___________

Birth date: __________________

Child’s age (in months): ___________

Instructions for the evaluator:

- Apply the set of items that corresponds to the child's age range.
- Remember to show caregivers the illustration on the corresponding full page for items that include an image.
- Before starting the questions, tell the caregivers:

**Now, the following questions are about the things your child currently does. Please answer “yes” or “no” to these questions. If you have doubts, you can also answer “I don’t know”. Remember that children learn and grow at different rhythms, so do not worry if your child does not do these things yet.** **Children will only perform some of these skills when they become older. If you have any doubts or feel uncomfortable, let me know, and we can move on to the next question.**

| Item | Item | Image | Answer | | |
| --- | --- | --- | --- | --- | --- |
| A1 | Does the child smile when people smile at her? |  | Yes | No | DK |
| A2 | Does the child squeeze a small object when it is placed in her hand (e.g., your finger, a spoon)? | 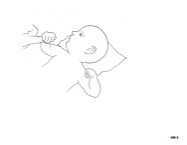 | Yes | No | DK |
| A3 | Does the child recognize you or other family members (e.g., smiling when they enter a place or moving towards them)? |  | Yes | No | DK |
| A4 | Does the child show an interest in new objects by trying to put them into her mouth? |  | Yes | No | DK |
| A5 | When the child is facedown, can she keep her head and chest up, using only her hands and arms for support? | 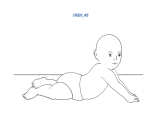 | Yes | No | DK |
| A6 | Is the child able to pick up a small object using only one hand (e.g. a small toy or small stone)? | 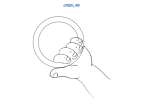 | Yes | No | DK |
| A7 | When the child is lying belly up, does she grab her foot? | 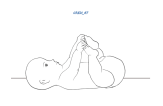 | Yes | No | DK |
| A8 | Does the child look at an object when someone says "look!" and points at it? |  | Yes | No | DK |
| A9 | Does the child look at an object of interest when it is removed from her field of view or hidden from her (e.g., placed under a cover, behind another object)? |  | Yes | No | DK |
| A10 | Does the child move or change position intentionally to grab objects that are out of her reach? |  | Yes | No | DK |
| A11 | Does the child play by banging an object on the floor or table? |  | Yes | No | DK |
| A12 | Can the child remain in the sitting position without help or support for more than a few seconds? | **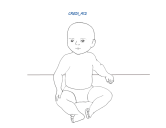** | Yes | No | DK |
| A13 | Can the child grab and eat small pieces of food with her fingers? | **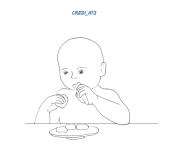** | Yes | No | DK |
| A14 | Can the child transfer a small object from one hand to another (e.g., small toy or small stone)? | **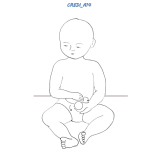** | Yes | No | DK |
| A15 | Is the child able to use gestures to indicate what she wants (e.g., puts her arms up when she wants to be picked up or points to water)? |  | Yes | No | DK |
| A16 | Can the child crawl, roll or crawl forward alone? | **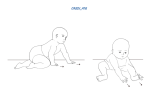** | Yes | No | DK |
| A17 | Can the child throw a small ball or small stone ahead? | **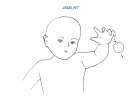** | Yes | No | DK |
| A18 | Can a child pick up and throw a small object (e.g., a small toy or small stone) into a bucket or bowl while sitting up? | *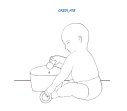* | Yes | No | DK |
| A19 | Can the child say one or more words (e.g., names such as “mama” or “ba” for ball)? |  | Yes | No | DK |
| A20 | Can the child walk a few steps while holding onto a person or object (e.g., wall or furniture)? | **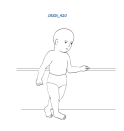** | Yes | No | DK |

Caregiver Reported Early Development InstrumentS (CREDI)

SHORT FORM: AGE RANGE 6–11 MONTHS

Date: _____________________________

Participant’s Identification: ___________

Birth date: __________________

Child’s age (in months): ___________

Instructions for the evaluator:

- Apply the set of items that corresponds to the child's age range.
- Remember to show caregivers the illustration on the corresponding full page for items that include an image.
- Before starting the questions, tell the caregivers:

**Now, the following questions are about the things your child currently does. Please answer “yes” or “no” to these questions. If you have doubts, you can also answer “I don’t know”. Remember that children learn and grow at different rhythms, so do not worry if your child does not do these things yet. Children will only perform some of these skills when they become older. If you have any doubts or feel uncomfortable, let me know, and we can move on to the next question.**

| Item # | Item | Image | Answer | | |
| --- | --- | --- | --- | --- | --- |
| B1 | Is the child able to pick up a small object using only one hand (e.g., a small toy or small stone)? | 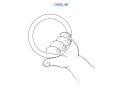 | Yes | No | DK |
| B2 | Does the child play by banging an object on the floor or table? |  | Yes | No | DK |
| B3 | Does the child move or intentionally change position to pick up objects that are out of her reach? |  | Yes | No | DK |
| B4 | Does the child look at an object of interest when it is removed from her field of view or hidden from her (e.g., placed under a cover, behind another object)? |  | Yes | No | DK |
| B5 | Can the child remain in the sitting position without help or support for more than a few seconds? | 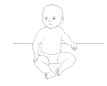 | Yes | No | DK |
| B6 | Does the child look at an object when someone says “look!” and points at it? |  | Yes | No | DK |
| B7 | Can the child grab and eat small pieces of food with her fingers? | 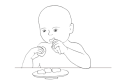 | Yes | No | DK |
| B8 | Can the child crawl, roll or crawl forward alone? | *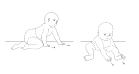* | Yes | No | DK |
| B9 | Can the child transfer a small object from one hand to another (e.g., small toy or small stone)? | *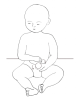* | Yes | No | DK |
| B10 | Is the child able to use gestures to indicate what she wants (e.g., puts her arms up when she wants to be picked up or points to water)? |  | Yes | No | DK |
| B11 | Can a child pick up and throw a small object (e.g., a small toy or small stone) into a bucket or bowl while sitting up? | 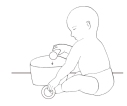 | Yes | No | DK |
| B12 | Can the child throw a small ball or small stone ahead? | **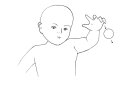** | Yes | No | DK |
| B13 | Can the child say one or more words (e.g., names like “mama” or “ba” for ball)? |  | Yes | No | DK |
| B14 | Does the child ask for your help using signs or words when she cannot do something by herself (e.g., picking up an object that is placed too high)? |  | Yes | No | DK |
| B15 | Can the child walk a few steps while holding onto a person or object (e.g., wall or furniture)? | 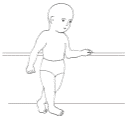 | Yes | No | DK |
| B16 | Can the child follow simple directions (e.g., “get up” or “come here”)? |  | Yes | No | DK |
| B17 | Can the child stand upright without holding onto something or receiving support? | **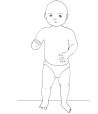** | Yes | No | DK |
| B18 | Can the child point to a person or object when someone asks about it/them (e.g., “Where is Mom?” Or “Where is the ball?”)? |  | Yes | No | DK |
| B19 | Can the child climb on objects such as a chair or a bench? | **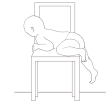** | Yes | No | DK |
| B20 | Can the child kick a ball or a round object? | **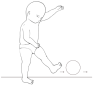** | Yes | No | DK |

Caregiver Reported Early Development InstrumentS (CREDI)

SHORT FORM: AGE RANGE 12–17 MONTHS

Date: _____________________________

Participant’s Identification: ___________

Birth date: __________________

Child’s age (in months): ___________

Instructions for the evaluator:

- Apply the set of items that corresponds to the child's age range.
- Remember to show caregivers the illustration on the corresponding full page for items that include an image.
- Before starting the questions, tell the caregivers:

**Now, the following questions are about the things your child currently does. Please answer “yes” or “no” to these questions. If you have doubts, you can also answer “I don’t know”. Remember that children learn and grow at different rhythms, so do not worry if your child does not do these things yet. Children will only perform some of these skills when they become older. If you have any doubts or feel uncomfortable, let me know, and we can move on to the next question.**

| Item # | Item | Image | Answer | | |
| --- | --- | --- | --- | --- | --- |
| C1 | Can the child stand upright without holding onto something or receiving support? | 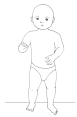 | Yes | No | DK |
| C2 | Can the child follow simple directions (e.g., “get up” or “come here”)? |  | Yes | No | DK |
| C3 | Does the child mimic other people's behavior (e.g., washing hands or dishes)? |  | Yes | No | DK |
| C4 | Can the child climb on objects such as a chair or a bench? | **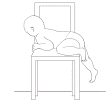** | Yes | No | DK |
| C5 | Is the child gentle to younger children (e.g., talking to them gently, touching other children carefully)? |  | Yes | No | DK |
| C6 | Is the child curious to learn new things (e.g., asking questions or exploring a new area)? |  | Yes | No | DK |
| C7 | Can the child point to a person or object when someone asks about it/them (e.g., “Where is Mom?” Or “Where is the ball?”)? |  | Yes | No | DK |
| C8 | Can the child kick a ball or a round object? | **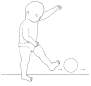** | Yes | No | DK |
| C9 | Does the child include other people in her plays (e.g., playing with interactive games, with other children)? |  | Yes | No | DK |
| C10 | Does the child show empathy or feelings when others are sad or hurt? |  | Yes | No | DK |
| C11 | Can the child run a few steps without falling or bumping into objects? | **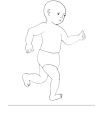** | Yes | No | DK |
| C12 | Can the child drink from a cup without a lid alone, without spilling? | **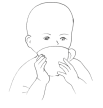** | Yes | No | DK |
| C13 | Can the child stack three or more objects (e.g., blocks, cups, bottle caps)? | **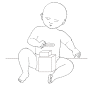** | Sim | No | NS |
| C14 | Is the child able to answer questions (e.g., “Do you want water?”) by saying “yes” or “no” instead of gesturing or nodding? |  | Sim | No | NS |
| C15 | Does the child play using objects as if they were other things (e.g., to imagine that a bottle is a doll, a stone is a car, or a spoon is a plane)? |  | Sim | No | NS |
| C16 | Can the child correctly name at least one family member other than the mother and the father (e.g., name of a brother, sister, aunt, uncle)? |  | Sim | No | NS |
| C17 | When the child wants something, can she ask for it by its name (e.g., food, water)? |  | Sim | No | NS |
| C18 | Can the child walk backwards? | *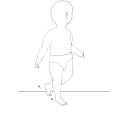* | Sim | No | NS |
| C19 | If you point to an object (e.g., cup or animal), does the child know how to name it correctly? |  | Sim | No | NS |
| C20 | Can the child speak more than 10 separate words (e.g., names such as “mama” or objects such as “ball”)? |  | Sim | No | NS |

Caregiver Reported Early Development InstrumentS (CREDI)

SHORT FORM: AGE RANGE 18–23 MONTHS

Date: _____________________________

Participant’s Identification: ___________

Birth date: __________________

Child’s age (in months): ___________

Instructions for the evaluator:

- Apply the set of items that corresponds to the child's age range.
- Remember to show caregivers the illustration on the corresponding full page for items that include an image.
- Before starting the questions, tell the caregivers:

**Now, the following questions are about the things your child currently does. Please answer “yes” or “no” to these questions. If you have doubts, you can also answer “I don’t know”. Remember that children learn and grow at different rhythms, so do not worry if your child does not do these things yet. Children will only perform some of these skills when they become older. If you have any doubts or feel uncomfortable, let me know, and we can move on to the next question.**

| Item # | Item | Image | Answer | | |
| --- | --- | --- | --- | --- | --- |
| D1 | Can the child walk backwards? | *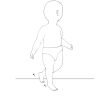* | Yes | No | DK |
| D2 | When the child wants something, can she ask for it by its name (e.g., food, water)? |  | Yes | No | DK |
| D3 | Can the child correctly name at least one family member other than the mother and the father (e.g., name of a brother, sister, aunt, uncle)? |  | Yes | No | DK |
| D4 | If you point to an object (e.g., cup or animal), does the child know how to name it correctly? |  | Yes | No | DK |
| D5 | Can the child take a piece of clothing off (e.g., take her top off)? | 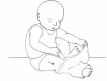 | Yes | No | DK |
| D6 | Can the child speak more than 10 separate words (e.g., names such as “mama” or objects such as “ball”)? |  | Yes | No | DK |
| D7 | Is the child able to tell you when she is tired or hungry? |  | Yes | No | DK |
| D8 | Can the child sing a short song or repeat rhyming words (ex: poem) by herself? |  | Yes | No | DK |
| D9 | Can the child jump with both feet leaving the ground? | 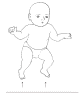 | Yes | No | DK |
| D10 | Does the child correctly use any of the words: “I”, “you”, “he” or “she’ (e.g., “I go to the store” or “He eats rice”)? |  | Yes | No | DK |
| D11 | Can the child can ask questions correctly using some of the words: “What”, “Who”, “Where”, “When”? |  | Yes | No | DK |
| D12 | Can the child count up to five objects (e.g., fingers, people)? |  | Yes | No | DK |
| D13 | Can the child speak using sentences with 3 or 4 words together (e.g., “I want water” or “The house is big”)? |  | Yes | No | DK |
| D14 | If you show the child two objects or people of different sizes, can she tell which object is the small one, and which is the large one? |  | Yes | No | DK |
| D15 | Can the child identify at least one color (e.g., red, blue, yellow)? |  | Yes | No | DK |
| D16 | Can the child explain in words what ordinary objects, such as a cup and chair, are for? |  | Yes | No | DK |
| D17 | If you ask the child to give you three objects (e.g., stone, beans), does the child give you the correct amount? |  | Yes | No | DK |
| D18 | If you point to an object, can the child correctly use the words “over”, “inside” or “below” to describe where it is (e.g. “The cup is on the table” instead of “The cup is in the table”)? |  | Yes | No | DK |
| D19 | Does the child ask about familiar people other than parents when they are not present (e.g., “Where is the neighbor?”)? |  | Yes | No | DK |
| D20 | Does the child ask “why” questions (e.g., “Why are you tall?”)? |  | Yes | No | DK |

Caregiver Reported Early Development InstrumentS (CREDI)

SHORT Form: AGE RANGE 24–29 MONTHS

Date: _____________________________

Participant’s Identification: ___________

Birth date: __________________

Child’s age (in months): ___________

Instructions for the evaluator:

- Apply the set of items that corresponds to the child's age range.
- Remember to show caregivers the illustration on the corresponding full page for items that include an image.
- Before starting the questions, tell the caregivers:

**Now, the following questions are about the things your child currently does. Please answer “yes” or “no” to these questions. If you have doubts, you can also answer “I don’t know”. Remember that children learn and grow at different rhythms, so do not worry if your child does not do these things yet. Children will only perform some of these skills when they become older. If you have any doubts or feel uncomfortable, let me know, and we can move on to the next question.**

| Item # | Item | Image | Answer | | |
| --- | --- | --- | --- | --- | --- |
| E1 | If you point to an object (e.g., cup or animal), does the child know how to name it correctly? |  | Yes | No | DK |
| E2 | Can the child speak more than 10 separate words (e.g., names such as “mama” or objects such as “ball”)? |  | Yes | No | DK |
| E3 | Can the child sing a short song or repeat rhyming words (ex: poem) by herself? |  | Yes | No | DK |
| E4 | Can the child jump with both feet leaving the ground? | 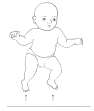 | Yes | No | DK |
| E5 | Can the child speak using sentences with 3 or 4 words together (e.g., “I want water” or “The house is big”)? |  | Yes | No | DK |
| E6 | Can the child can ask questions correctly using some of the words: “What”, “Who”, “Where”, “When”? |  | Yes | No | DK |
| E7 | Does the child correctly use any of the words: “I”, “you”, “he” or “she’ (e.g., “I go to the store” or “He eats rice”)? |  | Yes | No | DK |
| E8 | Does the child ask about familiar people other than parents when they are not present (e.g., “Where is the neighbor?”)? |  | Yes | No | DK |
| E9 | Can the child count up to five objects (e.g., fingers, people)? |  | Yes | No | DK |
| E10 | Can the child identify at least one color (e.g., red, blue, yellow)? |  | Yes | No | DK |
| E11 | Does the child often kick, bite or hit other children or adults? |  | Yes | No | DK |
| E12 | If you show the child two objects or people of different sizes, can she tell which object is the small one, and which is the large one? |  | Yes | No | DK |
| E13 | Does the child become isolated / reserved or embarrassed in new situations? |  | Yes | No | DK |
| E14 | If you point to an object, can the child correctly use the words “over”, “inside” or “below” to describe where it is (e.g. “The cup is on the table” instead of “The cup is in the table”)? |  | Yes | No | DK |
| E15 | Does the child ask “why” questions (e.g., “Why are you tall?”)? |  | Yes | No | DK |
| E16 | If you ask the child to give you three objects (e.g., stone, beans), does the child give you the correct amount? |  | Yes | No | DK |
| E17 | Can the child explain in words what ordinary objects, such as a cup and chair, are for? |  | Yes | No | DK |
| E18 | Can the child put on clothes or a few pieces of clothing alone (e.g. putting on pants or a shirt without help)? | 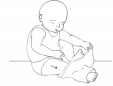 | Yes | No | DK |
| E19 | Can the child tell what others like and dislike (e.g., “Mom does not like fruit”, “Dad likes football”)? |  | Yes | No | DK |
| E20 | Can the child talk about things that happened in the past using the correct language (e.g., “Yesterday I played with my friends” or “Last week she went to the supermarket”)? |  | Yes | No | DK |

Caregiver Reported Early Development InstrumentS (CREDI)

SHORT Form: AGE RANGE 30–35 MONTHS

Date: _____________________________

Participant’s Identification: ___________

Birth date: __________________

Child’s age (in months): ___________

Instructions for the evaluator:

- Apply the set of items that corresponds to the child's age range.
- Remember to show caregivers the illustration on the corresponding full page for items that include an image.
- Before starting the questions, tell the caregivers:

**Now, the following questions are about the things your child currently does. Please answer “yes” or “no” to these questions. If you have doubts, you can also answer “I don’t know”. Remember that children learn and grow at different rhythms, so do not worry if your child does not do these things yet. Children will only perform some of these skills when they become older. If you have any doubts or feel uncomfortable, let me know, and we can move on to the next question.**

| Item # | Item | Image | Answer | | |
| --- | --- | --- | --- | --- | --- |
| F1 | Can the child speak more than 10 separate words (e.g., names such as “mama” or objects such as “ball”)? |  | Yes | No | DK |
| F2 | Can the child jump with both feet leaving the ground? | 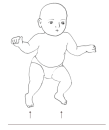 | Yes | No | DK |
| F3 | Can the child speak using sentences with 3 or 4 words together (e.g., “I want water” or “The house is big”)? |  | Yes | No | DK |
| F4 | Can the child sing a short song or repeat rhyming phrases (ex: poem) alone? |  | Yes | No | DK |
| F5 | Can the child can ask questions correctly using some of the words: “What”, “Who”, “Where”, “When”? |  | Yes | No | DK |
| F6 | Does the child ask about familiar people other than parents when they are not present (e.g., “Where is the neighbor?”)? |  | Yes | No | DK |
| F7 | Does the child correctly use any of the words: “I”, “you”, “he” or “she’ (e.g., “I go to the store” or “He eats rice”)? |  | Yes | No | DK |
| F8 | Can the child count up to five objects (e.g., fingers, people)? |  | Yes | No | DK |
| F9 | Can the child identify at least one color (e.g., red, blue, yellow)? |  | Yes | No | DK |
| F10 | If you show the child two objects or people of different sizes, can she tell which object is the small one, and which is the large one? |  | Yes | No | DK |
| F11 | If you point to an object, can the child correctly use the words “over”, “inside” or “below” to describe where it is (e.g. “The cup is on the table” instead of “The cup is in the table”)? |  | Yes | No | DK |
| F12 | Can the child explain in words what ordinary objects, such as a cup and chair, are for? |  | Yes | No | DK |
| F13 | Can the child put on clothes or a few pieces of clothing alone (e.g. putting on pants or a shirt without help)? | 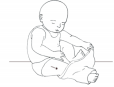 | Yes | No | DK |
| F14 | Does the child ask “why” questions (e.g., “Why are you tall?”)? |  | Yes | No | DK |
| F15 | If you ask the child to give you three objects (e.g., stone, beans), does the child give you the correct amount? |  | Yes | No | DK |
| F16 | Does the child often kick, bite or hit other children or adults? |  | Yes | No | DK |
| F17 | Does the child become isolated / reserved or embarrassed in new situations? |  | Yes | No | DK |
| F18 | Does the child often act impulsively or without thinking (e.g., running out into the street without looking)? |  | Yes | No | DK |
| F19 | Can the child tell what others like and dislike (e.g., “Mom does not like fruit”, “Dad likes football”)? |  | Yes | No | DK |
| F20 | Can the child talk about things that happened in the past using the correct language (e.g., “Yesterday I played with my friends” or “Last week she went to the supermarket”)? |  | Yes | No | DK |
